# Supplementary material for: Updating atomic charge parameters of aliphatic amino acids: a quest to improve the performance of molecular modeling via sequential molecular dynamics and DFT-GIAO-NMR calculations
Source: Royal Society of Chemistry journal article supplement (doi:10.1039/d1cp00183c), 2021-01-01
Supplement: d1cp00183c1.pdf [file d1cp00183c1.pdf]

## Support Information Material

# Updating atomic charges parameters of aliphatic amino acids: A quest to improve the performance of molecular modeling via sequential molecular dynamics and DFT-GIAO-NMR calculations

*Guilherme Colherinhas<sup>a,b</sup>*

<sup>a</sup>*Departamento de Física, CEPAE, Universidade Federal de Goiás, 74690-900, Goiânia, GO, Brazil*

<sup>b</sup>*Instituto de Física, Universidade Federal de Goiás, 74690-900, Goiânia, GO, Brazil*

---

### ARTICLE INFO

#### Keywords:

Molecular dynamics;  
Aliphatic Amino acid;  
Atomic charges;  
GIAO-NMR-DFT;

[gcolherinhas@ufg.br](mailto:gcolherinhas@ufg.br)

### ABSTRACT

In this work we observe the behavior of the dipole moment, atomic charges, solute-solvent interactions and NMR spectroscopy of aliphatic amino acids in water solution through computational simulations of classical molecular dynamics and DFT quantum calculations. Our results show that the convergence of the atomic charge of the solute, from an iterative process, together with the dipole moment of the amino acid, alters the lifetime of the hydrogen bonds present in the first solvation shell, modifying its structure and dynamics. Using GIAO-DFT-NMR calculations, we assessed the impact of these structural solute-solvent modifications on the magnetic shielding constants of the solute's carbon atoms. In this sense, we evaluate the importance of an update in the parameters that describe the atomic charges present in the CHARMM36 force field.

**Table S1**

Original CHARMM36 atomic charges (S1) and updated atomic charges (S4) for alanine (Ala) in water solution.

| Alanine<br>Atoms | Atomic charges ( <i>q</i> ) |             |  | $\Delta q$   (%) |
|------------------|-----------------------------|-------------|--|------------------|
|                  | Original                    | Updated     |  |                  |
|                  | CHARMM36.ff                 | CHARMM36.ff |  |                  |
| N1               | -0.30                       | -0.584338   |  | 95%              |
| H1               | 0.33                        | 0.412795    |  | 25%              |
| H2               | 0.33                        | 0.413343    |  | 25%              |
| H3               | 0.33                        | 0.410494    |  | 24%              |
| C1               | 0.21                        | 0.137255    |  | 35%              |
| H4               | 0.10                        | 0.073979    |  | 26%              |
| C2               | -0.27                       | -0.271780   |  | 1%               |
| H5               | 0.09                        | 0.096421    |  | 7%               |
| H6               | 0.09                        | 0.095631    |  | 6%               |
| H7               | 0.09                        | 0.098902    |  | 10%              |
| C3               | 0.34                        | 0.976132    |  | 187%             |
| O1               | -0.67                       | -0.920562   |  | 37%              |
| O2               | -0.67                       | -0.938274   |  | 40%              |

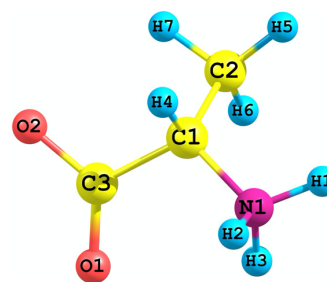**Table S2**

Original CHARMM36 atomic charges (S1) and updated atomic charges (S4) for glycine (Gly) in water solution.

| Glycine<br>Atoms | Atomic charges ( <i>q</i> ) |             |  | $\Delta q$   (%) |
|------------------|-----------------------------|-------------|--|------------------|
|                  | Original                    | Updated     |  |                  |
|                  | CHARMM36.ff                 | CHARMM36.ff |  |                  |
| N1               | -0.30                       | -0.302125   |  | 1%               |
| H1               | 0.33                        | 0.353656    |  | 7%               |
| H2               | 0.33                        | 0.354866    |  | 8%               |
| H3               | 0.33                        | 0.353980    |  | 7%               |
| C1               | 0.13                        | -0.168448   |  | 230%             |
| H4               | 0.09                        | 0.122561    |  | 36%              |
| H5               | 0.09                        | 0.119051    |  | 32%              |
| C3               | 0.34                        | 1.091121    |  | 221%             |
| O1               | -0.67                       | -0.940203   |  | 40%              |
| O2               | -0.67                       | -0.984460   |  | 47%              |

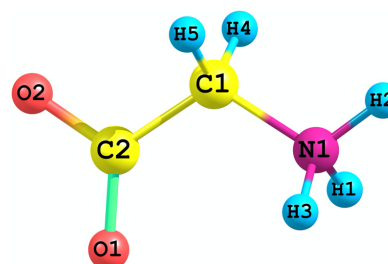**Table S3**

Original CHARMM36 atomic charges (S1) and updated atomic charges (S4) for isoleucine (Ile) in water solution.

| Isoleucine<br>Atoms | Atomic charges ( <i>q</i> ) |             |  | $\Delta q$   (%) |
|---------------------|-----------------------------|-------------|--|------------------|
|                     | Original                    | Updated     |  |                  |
|                     | CHARMM36.ff                 | CHARMM36.ff |  |                  |
| N1                  | -0.30                       | -0.603732   |  | 101%             |
| H1                  | 0.33                        | 0.413942    |  | 25%              |
| H2                  | 0.33                        | 0.418826    |  | 27%              |
| H3                  | 0.33                        | 0.415861    |  | 26%              |
| C1                  | 0.21                        | -0.014785   |  | 107%             |
| H4                  | 0.10                        | 0.080907    |  | 19%              |
| C2                  | -0.09                       | 0.310981    |  | 446%             |
| H5                  | 0.09                        | -0.004705   |  | 105%             |
| C3                  | -0.27                       | -0.419443   |  | 55%              |
| H6                  | 0.09                        | 0.105674    |  | 17%              |
| H7                  | 0.09                        | 0.103343    |  | 15%              |
| H8                  | 0.09                        | 0.103197    |  | 15%              |
| C4                  | -0.18                       | -0.015311   |  | 91%              |
| H9                  | 0.09                        | 0.009439    |  | 90%              |
| H10                 | 0.09                        | 0.037036    |  | 59%              |
| C5                  | -0.27                       | -0.213746   |  | 21%              |
| H11                 | 0.09                        | 0.054092    |  | 40%              |
| H12                 | 0.09                        | 0.054335    |  | 40%              |
| H13                 | 0.09                        | 0.051478    |  | 43%              |
| C6                  | 0.34                        | 1.017883    |  | 199%             |
| O1                  | -0.67                       | -0.951464   |  | 42%              |
| O2                  | -0.67                       | -0.953807   |  | 42%              |

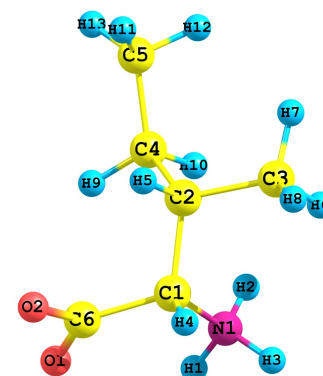

**Table S4**

Original CHARMM36 atomic charges (S1) and updated atomic charges (S4) for leucine (Leu) in water solution.

| Leucine Atoms | Atomic charges ( <i>q</i> ) |                     | $\Delta q$   (%) |
|---------------|-----------------------------|---------------------|------------------|
|               | Original CHARMM36.ff        | Updated CHARMM36.ff |                  |
| N1            | -0.30                       | -0.593067           | 98%              |
| H1            | 0.33                        | 0.407199            | 23%              |
| H2            | 0.33                        | 0.414261            | 26%              |
| H3            | 0.33                        | 0.412714            | 25%              |
| C1            | 0.21                        | 0.108926            | 48%              |
| H4            | 0.10                        | 0.069366            | 31%              |
| C2            | -0.18                       | -0.253899           | 41%              |
| H5            | 0.09                        | 0.072629            | 19%              |
| H6            | 0.09                        | 0.079818            | 11%              |
| C3            | -0.09                       | 0.504626            | 661%             |
| H7            | 0.09                        | -0.059512           | 166%             |
| C4            | -0.27                       | -0.394217           | 46%              |
| H8            | 0.09                        | 0.085138            | 5%               |
| H9            | 0.09                        | 0.087400            | 3%               |
| H10           | 0.09                        | 0.082613            | 8%               |
| C5            | -0.27                       | -0.414079           | 53%              |
| H11           | 0.09                        | 0.089594            | 0%               |
| H12           | 0.09                        | 0.094440            | 5%               |
| H13           | 0.09                        | 0.088531            | 2%               |
| C6            | 0.34                        | 0.977581            | 188%             |
| O1            | -0.67                       | -0.930695           | 39%              |
| O2            | -0.67                       | -0.929365           | 39%              |

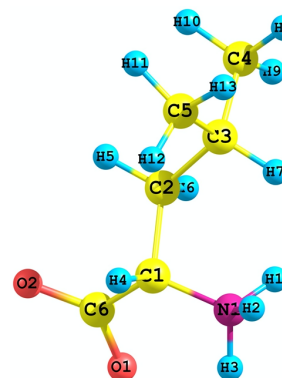**Table S5**

Original CHARMM36 atomic charges (S1) and updated atomic charges (S4) for proline (Pro) in water solution.

| Proline Atoms | Atomic charges ( <i>q</i> ) |                     | $\Delta q$   (%) |
|---------------|-----------------------------|---------------------|------------------|
|               | Original CHARMM36.ff        | Updated CHARMM36.ff |                  |
| N1            | -0.07                       | -0.109977           | 57%              |
| H1            | 0.24                        | 0.325234            | 36%              |
| H2            | 0.24                        | 0.295551            | 23%              |
| C1            | 0.16                        | -0.024555           | 115%             |
| H3            | 0.09                        | 0.084721            | 6%               |
| H4            | 0.09                        | 0.088657            | 1%               |
| C2            | 0.16                        | -0.069996           | 144%             |
| H5            | 0.09                        | 0.095824            | 6%               |
| C3            | -0.18                       | -0.023012           | 87%              |
| H6            | 0.09                        | 0.048323            | 46%              |
| H7            | 0.09                        | 0.039358            | 56%              |
| C4            | -0.18                       | 0.042010            | 123%             |
| H8            | 0.09                        | 0.036651            | 59%              |
| H9            | 0.09                        | 0.033564            | 63%              |
| C5            | 0.34                        | 1.019092            | 200%             |
| O1            | -0.67                       | -0.944638           | 41%              |
| O2            | -0.67                       | -0.936808           | 40%              |

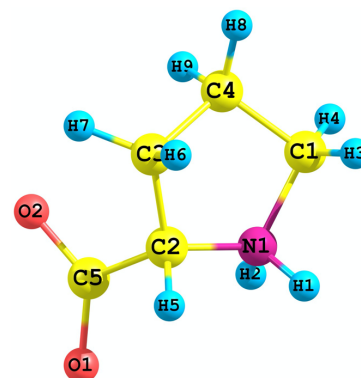**Table S6**

Original CHARMM36 atomic charges (S1) and updated atomic charges (S4) for valine (Val) in water solution.

| Valine Atoms | Atomic charges ( <i>q</i> ) |                     | $\Delta q$   (%) |
|--------------|-----------------------------|---------------------|------------------|
|              | Original CHARMM36.ff        | Updated CHARMM36.ff |                  |
| N1           | -0.30                       | -0.442198           | 47%              |
| H1           | 0.33                        | 0.376901            | 14%              |
| H2           | 0.33                        | 0.380043            | 15%              |
| H3           | 0.33                        | 0.381646            | 16%              |
| C1           | 0.21                        | -0.083391           | 140%             |
| H4           | 0.10                        | 0.076902            | 23%              |
| C2           | -0.09                       | 0.404919            | 550%             |
| H5           | 0.09                        | -0.008321           | 109%             |
| C3           | -0.27                       | -0.403742           | 50%              |
| H6           | 0.09                        | 0.096686            | 7%               |
| H7           | 0.09                        | 0.100019            | 11%              |
| H8           | 0.09                        | 0.096036            | 7%               |
| C4           | -0.27                       | -0.364971           | 35%              |
| H9           | 0.09                        | 0.092570            | 3%               |
| H10          | 0.09                        | 0.091495            | 2%               |
| H11          | 0.09                        | 0.088054            | 2%               |
| C5           | 0.34                        | 1.046798            | 208%             |
| O1           | -0.67                       | -0.954834           | 43%              |
| O2           | -0.67                       | -0.974611           | 45%              |

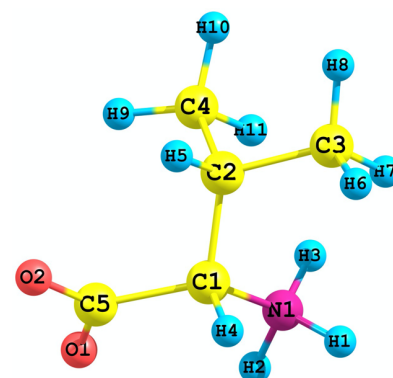

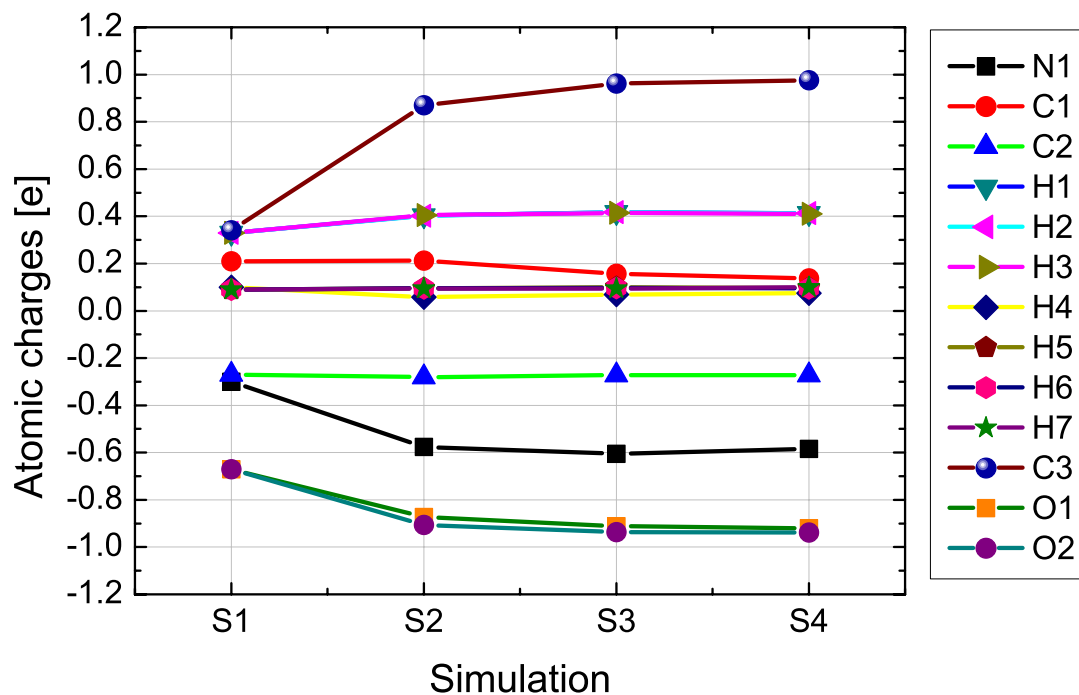

Figure S1: Convergence of atomic charge values [in e] during the dipole moment convergence process. S1 corresponds to the MD-simulation performed with CHARMM36 atomic charges and S4 corresponds to the MD-simulation performed with updated atomic charges. Results for Alanine.

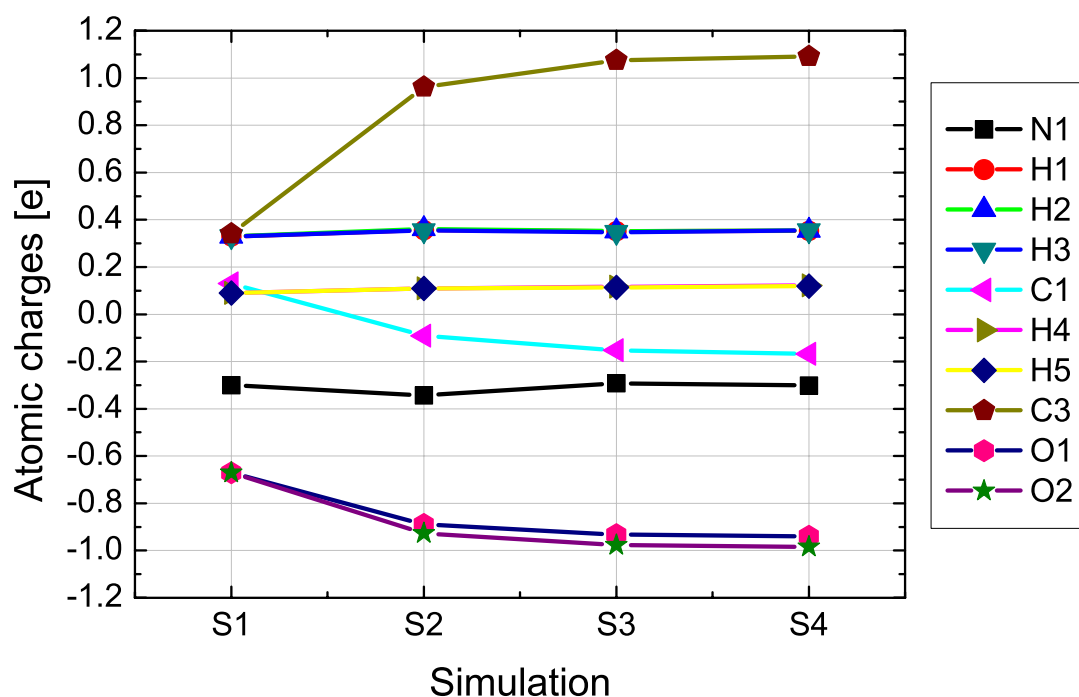

Figure S2: Convergence of atomic charge values [in e] during the dipole moment convergence process. S1 corresponds to the MD-simulation performed with CHARMM36 atomic charges and S4 corresponds to the MD-simulation performed with updated atomic charges. Results for Glycine.

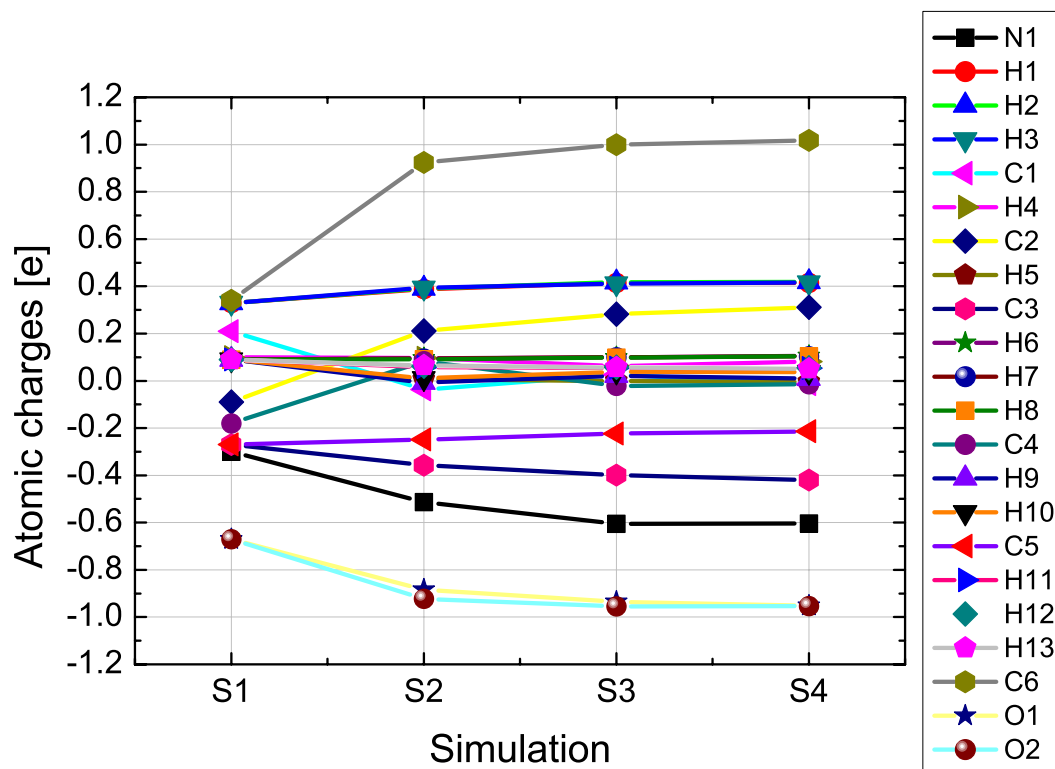

Figure S3: Convergence of atomic charge values [in e] during the dipole moment convergence process. S1 corresponds to the MD-simulation performed with CHARMM36 atomic charges and S4 corresponds to the MD-simulation performed with updated atomic charges. Results for Isoleucine.

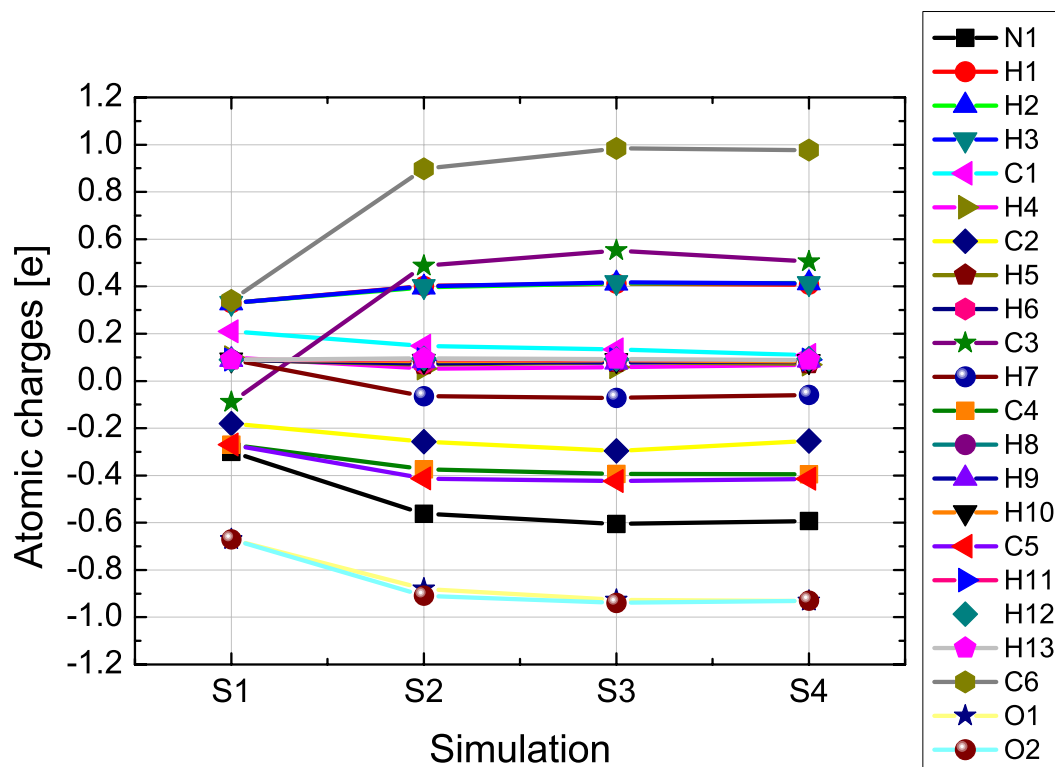

Figure S4: Convergence of atomic charge values [in e] during the dipole moment convergence process. S1 corresponds to the MD-simulation performed with CHARMM36 atomic charges and S4 corresponds to the MD-simulation performed with updated atomic charges. Results for Leucine.

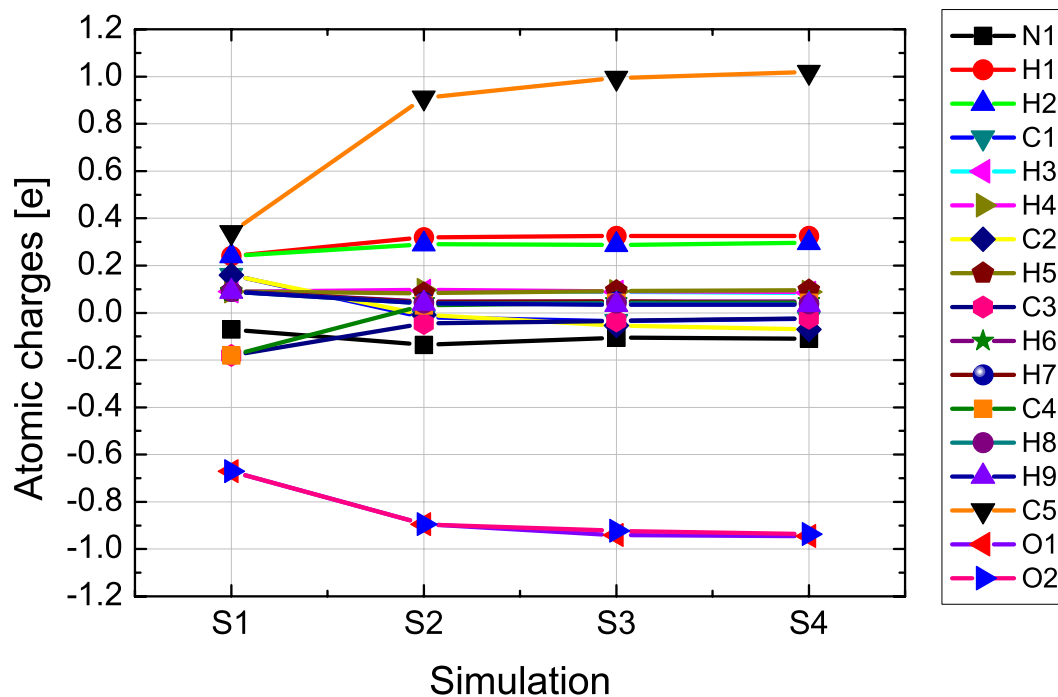

Figure S5: Convergence of atomic charge values [in e] during the dipole moment convergence process. S1 corresponds to the MD-simulation performed with CHARMM36 atomic charges and S4 corresponds to the MD-simulation performed with updated atomic charges. Results for Proline.

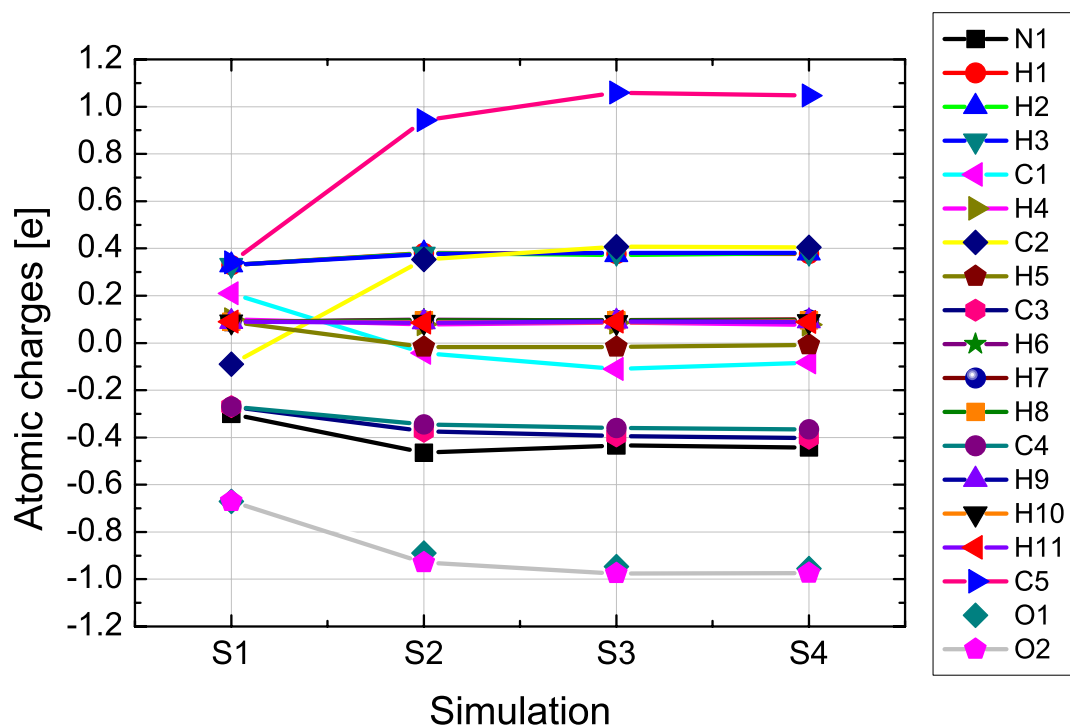

Figure S6: Convergence of atomic charge values [in e] during the dipole moment convergence process. S1 corresponds to the MD-simulation performed with CHARMM36 atomic charges and S4 corresponds to the MD-simulation performed with updated atomic charges. Results for Valine.
